# Supplementary material for: Alterations in Cancer Treatment During the First Year of the COVID-19 Pandemic in the US
Source: PubMed Central journal article supplement (PMC10616721; doi:10.1001/jamanetworkopen.2023.40148), 2023-10-30

## Supplemental Online Content

Janczewski LM, Cotler J, Merkow RP, et al. Alterations in cancer treatment during the first year of the COVID-19 pandemic in the US. *JAMA Netw Open*. 2023;6(10):e2340148. doi:10.1001/jamanetworkopen.2023.40148

**eFigure 1.** Consort Diagram

**eTable 1.** Changes in Age of Treated Patients by Cancer Site in the Year 2020

**eTable 2.** Travel Distance in Miles by Cancer Site in the Year 2020

**eTable 3.** Coordination of Care Received at Single Versus Multiple Institutions by Cancer Site in the Year 2020

**eTable 4.** Utilization of Treatment in the Year 2020 Compared With Prior Years

**eTable 5.** Utilization of Treatment by Facility Type During the COVID-19 Pandemic

**eFigure 2.** Number of Hospitals per Facility Type in the NCDB

**eFigure 3.** Utilization of Treatment in the Year 2020 Compared With Prior Years by Primary Site

This supplemental material has been provided by the authors to give readers additional information about their work.

**eFigure 1.** Consort Diagram

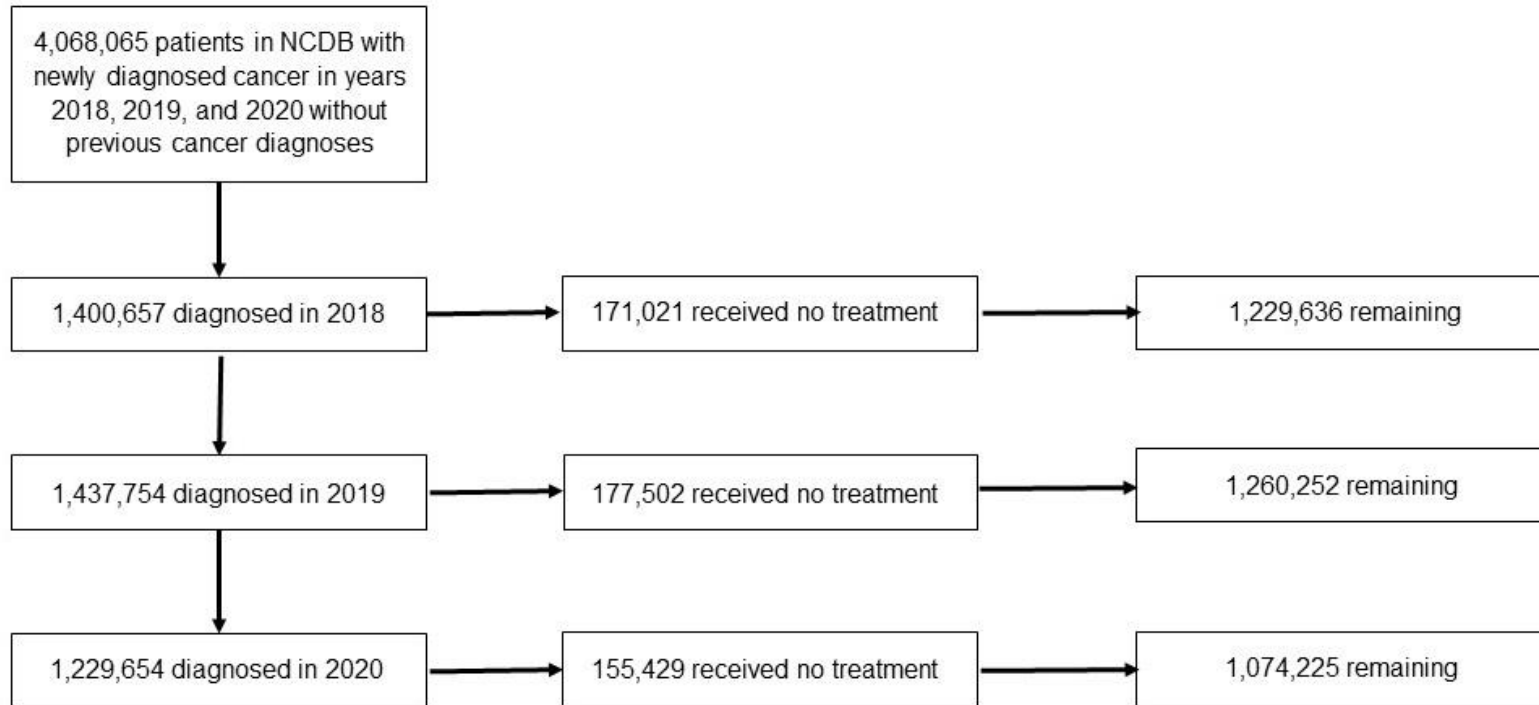

**eTable 1.** Changes in Age of Treated Patients by Cancer Site in the Year 2020

| Primary Site       | Age at Diagnosis (years) | Observed No. (%) | Expected No. (% [95% CI])  | Corrected p-Value | Observed - Expected | % Decrease in 2020 |
|--------------------|--------------------------|------------------|----------------------------|-------------------|---------------------|--------------------|
| All Sites Combined | 18 - 39                  | 61,728 (5.0)     | 79,615 (5.4 [5.3,5.4])     | <.001             | -17887              | 22.47              |
|                    | 40 - 49                  | 96,112 (7.8)     | 121,249 (8.2 [8.1,8.2])    | <.001             | -25137              | 20.73              |
|                    | 50 - 59                  | 214,985 (17.5)   | 267,842 (18.1 [18.0,18.2]) | <.001             | -52857              | 19.73              |
|                    | 60 - 69                  | 370,356 (30.1)   | 434,876 (29.4 [29.3,29.5]) | <.001             | -64520              | 14.84              |
|                    | 70 - 79                  | 324,119 (26.4)   | 371,699 (25.1 [25.0,25.2]) | <.001             | -47580              | 12.80              |
|                    | 80 - 89                  | 139,168 (11.3)   | 168,686 (11.4 [11.3,11.4]) | 0.03              | -29518              | 17.50              |
|                    | 90 +                     | 23,186 (1.9)     | 35,970 (2.4 [2.4,2.5])     | <.001             | -12784              | 35.54              |
| Breast             | 18 - 39                  | 10,812 (4.6)     | 13,063 (4.7 [4.7,4.8])     | 0.09              | -2251               | 17.23              |
|                    | 40 - 49                  | 32,857 (14.1)    | 38,953 (14.1 [14.0,14.3])  | >.99              | -6096               | 15.65              |
|                    | 50 - 59                  | 51,070 (21.9)    | 60,448 (21.9 [21.8,22.1])  | >.99              | -9378               | 15.51              |
|                    | 60 - 69                  | 66,897 (28.7)    | 77,875 (28.3 [28.1,28.4])  | <.001             | -10978              | 14.10              |
|                    | 70 - 79                  | 51,707 (22.2)    | 58,854 (21.4 [21.2,21.5])  | <.001             | -7147               | 12.14              |
|                    | 80 - 89                  | 17,333 (7.4)     | 21,485 (7.8 [7.7,7.9])     | <.001             | -4152               | 19.33              |
|                    | 90 +                     | 2,655 (1.1)      | 4,749 (1.7 [1.7,1.8])      | <.001             | -2094               | 44.10              |
| Colon              | 18 - 39                  | 3,137 (3.6)      | 3,396 (3.3 [3.1,3.4])      | <.001             | -259                | 7.63               |
|                    | 40 - 49                  | 7,952 (9.0)      | 8,768 (8.4 [8.2,8.6])      | <.001             | -816                | 9.31               |
|                    | 50 - 59                  | 17,349 (19.7)    | 21,122 (20.2 [20.0,20.5])  | <.001             | -3773               | 17.86              |
|                    | 60 - 69                  | 22,881 (26.0)    | 27,423 (26.3 [26.0,26.5])  | 0.43              | -4542               | 16.56              |
|                    | 70 - 79                  | 20,653 (23.5)    | 24,505 (23.5 [23.2,23.7])  | >.99              | -3852               | 15.72              |
|                    | 80 - 89                  | 13,172 (15.0)    | 15,684 (15.0 [14.8,15.2])  | >.99              | -2512               | 16.02              |
|                    | 90 +                     | 2,852 (3.2)      | 3,448 (3.3 [3.2,3.4])      | >.99              | -596                | 17.27              |
| Lung               | 18 - 39                  | 779 (0.5)        | 1,405 (0.8 [0.8,0.8])      | <.001             | -626                | 44.54              |
|                    | 40 - 49                  | 3,204 (2.2)      | 4,391 (2.5 [2.4,2.6])      | <.001             | -1187               | 27.02              |
|                    | 50 - 59                  | 18,621 (12.7)    | 23,654 (13.6 [13.4,13.7])  | <.001             | -5033               | 21.28              |
|                    | 60 - 69                  | 48,389 (33.1)    | 55,068 (31.6 [31.4,31.9])  | <.001             | -6679               | 12.13              |
|                    | 70 - 79                  | 51,207 (35.0)    | 59,889 (34.4 [34.2,34.6])  | <.001             | -8682               | 14.50              |
|                    | 80 - 89                  | 21,461 (14.7)    | 26,152 (15.0 [14.9,15.2])  | 0.002             | -4691               | 17.94              |
|                    | 90 +                     | 2,454 (1.7)      | 3,519 (2.0 [2.0,2.1])      | <.001             | -1065               | 30.27              |
| Melanoma           | 18 - 39                  | 3,643 (7.0)      | 5,166 (7.6 [7.4,7.8])      | <.001             | -1523               | 29.48              |
|                    | 40 - 49                  | 4,438 (8.6)      | 6,043 (8.9 [8.7,9.1])      | 0.07              | -1605               | 26.56              |
|                    | 50 - 59                  | 8,397 (16.2)     | 11,455 (16.8 [16.6,17.1])  | <.001             | -3058               | 26.70              |

|                |                |               |                           |       |       |       |
|----------------|----------------|---------------|---------------------------|-------|-------|-------|
|                | <b>60 - 69</b> | 14,025 (27.1) | 17,759 (26.1 [25.8,26.4]) | <.001 | -3734 | 21.03 |
|                | <b>70 - 79</b> | 13,542 (26.1) | 16,769 (24.7 [24.3,25.0]) | <.001 | -3227 | 19.24 |
|                | <b>80 - 89</b> | 6,621 (12.8)  | 8,708 (12.8 [12.6,13.1])  | >.99  | -2087 | 23.97 |
|                | <b>90 +</b>    | 1,166 (2.2)   | 2,098 (3.1 [3.0,3.2])     | <.001 | -932  | 44.44 |
| <b>Stomach</b> | <b>18 - 39</b> | 547 (3.4)     | 676 (3.5 [3.3,3.8])       | >.99  | -129  | 19.03 |
|                | <b>40 - 49</b> | 1,133 (7.0)   | 1,396 (7.3 [6.9,7.7])     | 0.75  | -263  | 18.82 |
|                | <b>50 - 59</b> | 2,625 (16.2)  | 3,150 (16.5 [16.0,17.0])  | >.99  | -525  | 16.67 |
|                | <b>60 - 69</b> | 4,609 (28.4)  | 5,346 (28.0 [27.4,28.6])  | >.99  | -737  | 13.79 |
|                | <b>70 - 79</b> | 4,497 (27.7)  | 5,153 (27.0 [26.4,27.6])  | 0.27  | -656  | 12.72 |
|                | <b>80 - 89</b> | 2,357 (14.5)  | 2,808 (14.7 [14.2,15.2])  | >.99  | -451  | 16.04 |
|                | <b>90 +</b>    | 460 (2.8)     | 562 (2.9 [2.7,3.2])       | >.99  | -102  | 18.09 |

**eTable 2.** Travel Distance in Miles by Cancer Site in the Year 2020

| Primary Site       | Travel Distance | Observed No. (%) | Expected No. (% [95% CI])  | Corrected p-Value | Observed - Expected | % Decrease in 2020 |
|--------------------|-----------------|------------------|----------------------------|-------------------|---------------------|--------------------|
| All Sites Combined | Within 5 miles  | 308,030 (25.1)   | 371,244 (25.1 [25.0,25.1]) | >.99              | -63214              | 17.03              |
|                    | 5-10 miles      | 263,786 (21.5)   | 313,359 (21.2 [21.1,21.2]) | <.001             | -49573              | 15.82              |
|                    | 10-15 miles     | 170,048 (13.8)   | 203,254 (13.7 [13.7,13.8]) | 0.003             | -33206              | 16.34              |
|                    | 15-35 miles     | 271,432 (22.1)   | 322,145 (21.7 [21.7,21.8]) | <.001             | -50713              | 15.74              |
|                    | > 35 miles      | 216,358 (17.6)   | 271,247 (18.3 [18.2,18.4]) | <.001             | -54889              | 20.24              |
| Breast             | Within 5 miles  | 63,667 (27.3)    | 75,954 (27.5 [27.4,27.7])  | 0.06              | -12287              | 16.18              |
|                    | 5-10 miles      | 56,376 (24.2)    | 66,172 (24.0 [23.8,24.1])  | 0.17              | -9796               | 14.80              |
|                    | 10-15 miles     | 35,511 (15.2)    | 41,974 (15.2 [15.1,15.3])  | >.99              | -6463               | 15.40              |
|                    | 15-35 miles     | 49,861 (21.4)    | 57,385 (20.8 [20.6,20.9])  | <.001             | -7524               | 13.11              |
|                    | > 35 miles      | 27,916 (12.0)    | 34,531 (12.5 [12.4,12.6])  | <.001             | -6615               | 19.16              |
| Colon              | Within 5 miles  | 25,318 (28.8)    | 30,184 (28.9 [28.6,29.2])  | >.99              | -4866               | 16.12              |
|                    | 5-10 miles      | 20,148 (22.9)    | 23,565 (22.6 [22.3,22.8])  | 0.12              | -3417               | 14.5               |
|                    | 10-15 miles     | 11,873 (13.5)    | 13,857 (13.3 [13.1,13.5])  | 0.3               | -1984               | 14.32              |
|                    | 15-35 miles     | 17,828 (20.3)    | 21,130 (20.2 [20.0,20.5])  | >.99              | -3302               | 15.63              |
|                    | > 35 miles      | 12,829 (14.6)    | 15,626 (15.0 [14.8,15.2])  | 0.005             | -2797               | 17.90              |
| Lung               | Within 5 miles  | 39,503 (27.0)    | 47,646 (27.3 [27.1,27.6])  | 0.04              | -8143               | 17.09              |
|                    | 5-10 miles      | 31,018 (21.2)    | 36,689 (21.1 [20.9,21.3])  | 0.56              | -5671               | 15.46              |
|                    | 10-15 miles     | 19,126 (13.1)    | 22,597 (13.0 [12.8,13.1])  | 0.88              | -3471               | 15.36              |
|                    | 15-35 miles     | 33,031 (22.6)    | 38,436 (22.1 [21.9,22.3])  | <.001             | -5405               | 14.06              |
|                    | > 35 miles      | 23,437 (16.0)    | 28,851 (16.6 [16.4,16.7])  | <.001             | -5414               | 18.76              |
| Melanoma           | Within 5 miles  | 9,429 (18.2)     | 14,354 (19.3 [19.0,19.6])  | <.001             | -4925               | 34.31              |
|                    | 5-10 miles      | 9,935 (19.2)     | 14,018 (18.8 [18.6,19.1])  | 0.28              | -4083               | 29.13              |
|                    | 10-15 miles     | 7,572 (14.6)     | 10,974 (14.7 [14.5,15.0])  | >.99              | -3402               | 31.00              |
|                    | 15-35 miles     | 13,610 (26.3)    | 19,087 (25.7 [25.3,26.0])  | 0.008             | -5477               | 28.69              |
|                    | > 35 miles      | 11,286 (21.8)    | 15,976 (21.5 [21.2,21.8])  | 0.46              | -4690               | 29.35              |
| Stomach            | Within 5 miles  | 4,392 (27.1)     | 5,261 (27.6 [26.9,28.2])   | 0.69              | -869                | 16.53              |
|                    | 5-10 miles      | 3,661 (22.6)     | 4,096 (21.5 [20.9,22.1])   | 0.004             | -435                | 10.62              |
|                    | 10-15 miles     | 2,104 (13.0)     | 2,461 (12.9 [12.4,13.4])   | >.99              | -357                | 14.52              |
|                    | 15-35 miles     | 3,311 (20.4)     | 3,854 (20.2 [19.6,20.8])   | >.99              | -543                | 14.10              |
|                    | > 35 miles      | 2,760 (17.0)     | 3,401 (17.8 [17.3,18.4])   | 0.03              | -641                | 18.85              |
| Other              | Within 5 miles  | 165,721 (23.9)   | 198,704 (23.7 [23.6,23.8]) | 0.007             | -32983              | 16.60              |

|                      |                |                            |       |        |       |
|----------------------|----------------|----------------------------|-------|--------|-------|
| <b>5-10 miles</b>    | 142,648 (20.5) | 169,883 (20.3 [20.2,20.4]) | <.001 | -27235 | 16.03 |
| <b>10-15 miles</b>   | 93,862 (13.5)  | 112,496 (13.4 [13.4,13.5]) | 0.08  | -18634 | 16.56 |
| <b>15-35 miles</b>   | 153,791 (22.2) | 183,126 (21.9 [21.8,21.9]) | <.001 | -29335 | 16.02 |
| <b>&gt; 35 miles</b> | 138,130 (19.9) | 173,806 (20.7 [20.7,20.8]) | <.001 | -35676 | 20.53 |

**eTable 3.** Coordination of Care Received at Single Versus Multiple Institutions by Cancer Site in the Year 2020

| Primary Site       | Coordination of Care | Observed No. (%) | Expected No. (% [95% CI])  | Corrected p-Value | Observed - Expected | % Decrease in 2020 |
|--------------------|----------------------|------------------|----------------------------|-------------------|---------------------|--------------------|
| All Sites Combined | Multiple             | 583,738 (47.5)   | 702,976 (47.7 [47.6,47.7]) | <.001             | -119238             | 16.96              |
|                    | Single               | 592,763 (48.2)   | 693,483 (47.0 [46.9,47.1]) | <.001             | -100720             | 14.52              |
| Breast             | Multiple             | 137,994 (59.1)   | 161,106 (58.3 [58.1,58.5]) | <.001             | -23112              | 14.35              |
|                    | Single               | 87,175 (37.4)    | 101,913 (36.9 [36.7,37.1]) | <.001             | -14738              | 14.46              |
| Colon              | Multiple             | 28,022 (43.1)    | 33,182 (43.2 [42.8,43.6])  | >.99              | -5160               | 15.55              |
|                    | Single               | 34,493 (53.1)    | 40,486 (52.7 [52.4,53.1])  | 0.150             | -5993               | 14.80              |
| Lung               | Multiple             | 60,849 (43.4)    | 73,132 (44.1 [43.9,44.4])  | <.001             | -12283              | 16.80              |
|                    | Single               | 73,398 (52.3)    | 84,759 (51.2 [50.9,51.4])  | <.001             | -11361              | 13.40              |
| Melanoma           | Multiple             | 30,456 (58.0)    | 38,686 (56.4 [56.0,56.7])  | <.001             | -8230               | 21.27              |
|                    | Single               | 19,960 (38.0)    | 26,226 (38.2 [37.8,38.6])  | 0.960             | -6266               | 23.89              |
| Stomach            | Multiple             | 7,158 (54.0)     | 8,582 (54.5 [53.7,55.3])   | 0.710             | -1424               | 16.59              |
|                    | Single               | 5,471 (41.3)     | 6,266 (39.8 [39.0,40.6])   | 0.002             | -795                | 12.68              |

**eTable 4.** Utilization of Treatment in the Year 2020 Compared With Prior Years

| Primary Site       | Treatment Modality | Observed No. (%) | Expected No. (% [95% CI])  | Corrected p-Value | Observed - Expected | % Decrease in 2020 |
|--------------------|--------------------|------------------|----------------------------|-------------------|---------------------|--------------------|
| All Sites Combined | Surgery            | 702,480 (57.1)   | 849,285 (57.6 [57.5,57.7]) | <.001             | -146805             | 17.29              |
|                    | Chemotherapy       | 392,860 (31.9)   | 460,874 (31.2 [31.2,31.3]) | <.001             | -68014              | 14.76              |
|                    | Radiation          | 362,556 (29.5)   | 443,036 (30.0 [29.9,30.1]) | <.001             | -80480              | 18.17              |
| Breast             | Surgery            | 209,363 (89.7)   | 244,109 (88.3 [88.2,88.4]) | <.001             | -34746              | 14.23              |
|                    | Chemotherapy       | 72,833 (31.2)    | 84,474 (30.5 [30.4,30.7])  | <.001             | -11641              | 13.78              |
|                    | Radiation          | 121,876 (52.2)   | 144,760 (52.3 [52.1,52.4]) | >.99              | -22884              | 15.81              |
| Colon              | Surgery            | 52,586 (80.9)    | 62,947 (82.0 [81.7,82.3])  | <.001             | -10361              | 16.46              |
|                    | Chemotherapy       | 25,462 (39.2)    | 29,291 (38.3 [38.0,38.7])  | <.001             | -3829               | 13.07              |
|                    | Radiation          | 2,229 (3.4)      | 2,739 (3.6 [3.4,3.7])      | 0.180             | -510                | 18.63              |
| Lung               | Surgery            | 32,543 (23.2)    | 40,975 (24.6 [24.4,24.8])  | <.001             | -8432               | 20.58              |
|                    | Chemotherapy       | 56,120 (40.0)    | 66,283 (40.2 [39.9,40.4])  | 0.60              | -10163              | 15.33              |
|                    | Radiation          | 57,677 (41.1)    | 69,800 (41.8 [41.6,42.1])  | <.001             | -12123              | 17.37              |
| Melanoma           | Surgery            | 49,191 (93.6)    | 62,666 (92.0 [91.8,92.2])  | <.001             | -13475              | 21.50              |
|                    | Chemotherapy       | 801 (1.5)        | 1,876 (2.8 [2.6,2.9])      | <.001             | -1075               | 57.30              |
|                    | Radiation          | 1,580 (3.0)      | 2,716 (4.0 [3.8,4.1])      | <.001             | -1136               | 41.82              |
| Stomach            | Surgery            | 4,939 (37.3)     | 6,362 (40.6 [39.8,41.3])   | <.001             | -1423               | 22.36              |
|                    | Chemotherapy       | 7,845 (59.2)     | 9,090 (58.4 [57.6,59.1])   | 0.170             | -1245               | 13.70              |
|                    | Radiation          | 3,229 (24.4)     | 3,999 (25.5 [24.8,26.2])   | 0.008             | -770                | 19.27              |



**eTable 5.** Utilization of Treatment by Facility Type During the COVID-19 Pandemic

| Primary Site       | Facility Type              | Observed No. (%) | Expected No. (% [95% CI])  | Corrected p-Value | Observed - Expected | % Decrease in 2020 | Decrease in Patients (n) |
|--------------------|----------------------------|------------------|----------------------------|-------------------|---------------------|--------------------|--------------------------|
| All Sites Combined | Academic/Research Program  | 449,529 (36.6)   | 554,622 (38.0 [38.0,38.1]) | <.001             | -105093             | 18.95              | 484                      |
|                    | Community Cancer Program   | 501,157 (40.8)   | 573,589 (39.3 [39.3,39.4]) | <.001             | -72432              | 12.63              | 99                       |
|                    | Integrated Network Program | 276,752 (22.5)   | 317,579 (21.8 [21.7,21.8]) | <.001             | -40827              | 12.86              | 110                      |
| Breast             | Academic/Research Program  | 72,590 (31.1)    | 87,484 (31.6 [31.5,31.8])  | <.001             | -14894              | 17.03              | 69                       |
|                    | Community Cancer Program   | 103,068 (44.2)   | 119,190 (43.1 [42.9,43.3]) | <.001             | -16122              | 13.53              | 22                       |
|                    | Integrated Network Program | 57,079 (24.5)    | 66,295 (24.0 [23.8,24.1])  | <.001             | -9216               | 13.90              | 25                       |
| Colon              | Academic/Research Program  | 18,285 (28.1)    | 22,370 (29.6 [29.2,29.9])  | <.001             | -4085               | 18.26              | 19                       |
|                    | Community Cancer Program   | 30,937 (47.6)    | 35,794 (47.3 [46.9,47.6])  | <.001             | -4857               | 13.57              | 7                        |
|                    | Integrated Network Program | 15,654 (24.1)    | 17,500 (23.1 [22.8,23.4])  | <.001             | -1846               | 10.55              | 5                        |
| Lung               | Academic/Research Program  | 42,312 (30.1)    | 53,153 (32.0 [31.8,32.2])  | <.001             | -10841              | 20.40              | 50                       |
|                    | Community Cancer Program   | 65,922 (47.0)    | 75,279 (45.3 [45.1,45.6])  | <.001             | -9357               | 12.43              | 13                       |
|                    | Integrated Network Program | 31,881 (22.7)    | 36,857 (22.2 [22.0,22.4])  | <.001             | -4976               | 13.50              | 13                       |
| Stomach            | Academic/Research Program  | 5,027 (37.9)     | 6,301 (40.5 [39.8,41.3])   | <.001             | -1274               | 20.22              | 6                        |
|                    | Community Cancer Program   | 5,256 (39.6)     | 5,856 (37.7 [36.9,38.4])   | <.001             | -600                | 10.24              | 1                        |
|                    | Integrated Network Program | 2,952 (22.3)     | 3,300 (21.2 [20.6,21.9])   | <.001             | -348                | 10.56              | 1                        |

**eFigure 2.** Number of Hospitals per Facility Type in the NCDB

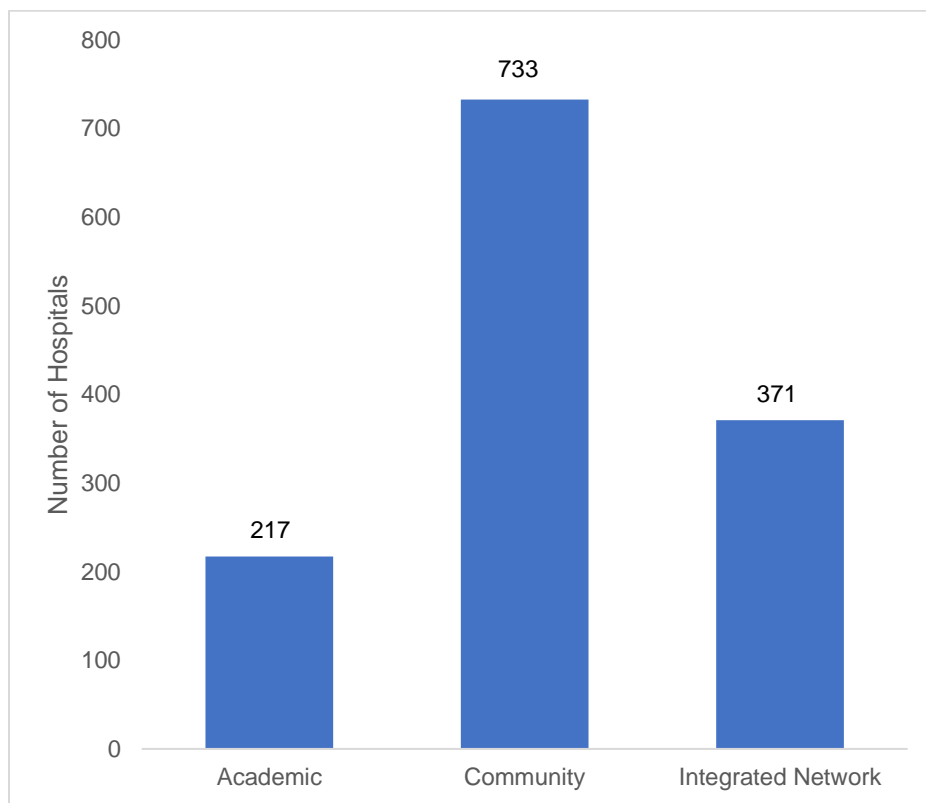

**eFigure 3.** Utilization of Treatment in the Year 2020 Compared With Prior Years by Primary Site

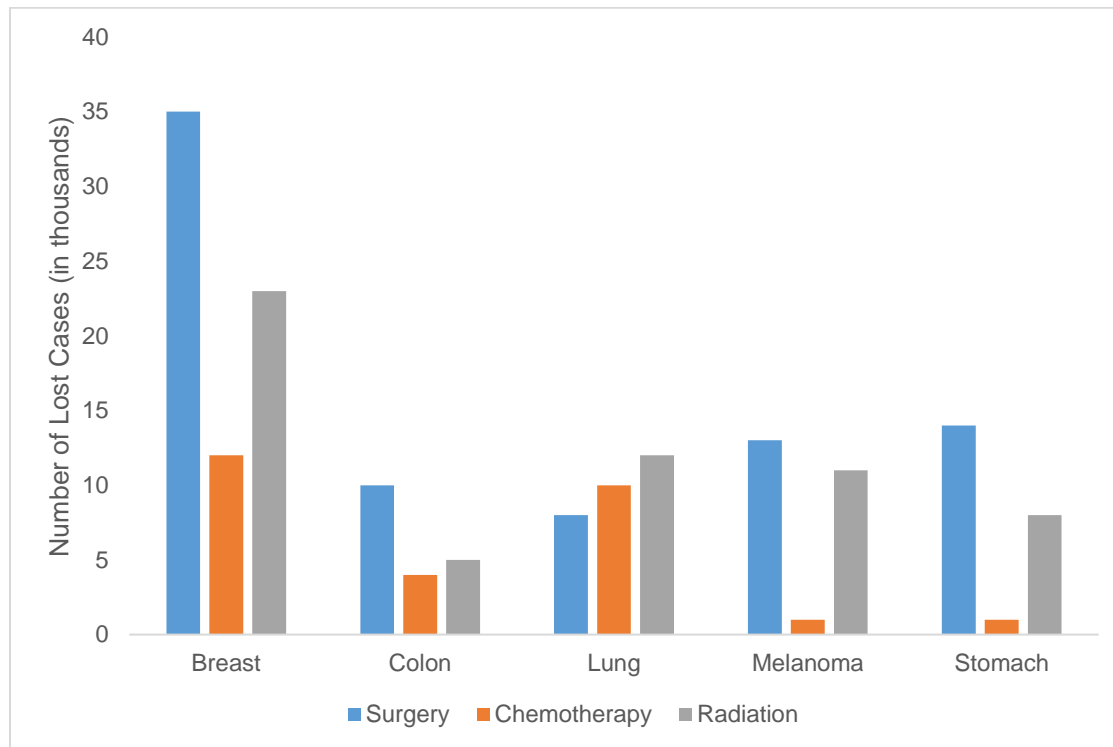

Supplement: jamanetwopen-e2340148-s001.pdf [file jamanetwopen-e2340148-s001.pdf]
