# Supplementary material for: Alterations in Cancer Treatment During the First Year of the COVID-19 Pandemic in the US
Source: PubMed Central journal article supplement (PMC10616721; doi:10.1001/jamanetworkopen.2023.40148), 2023-10-30
Supplement: jamanetwopen-e2340148-s002.pdf [file jamanetwopen-e2340148-s002.pdf]

## Data Sharing Statement

Janczewski. Alterations in Cancer Treatment During the First Year of the COVID-19 Pandemic in the US. *JAMA Netw Open*. Published October 30, 2023.

doi:10.1001/jamanetworkopen.2023.40148

### Data

**Data available:** No

### Additional Information

**Explanation for why data not available:** This data came from the NCDB and is restricted in its use beyond the original sharing. The data can readily be obtained through the NCDB for eligible users.
